# Supplementary material for: Supramolecular motifs formed by CH3/Cl-substituted arene groups: evidence for structural differences in thiophosphoramides and similarities in their complexes
Source: Royal Society of Chemistry journal article supplement (doi:10.1039/d4ra05281a), 2024-01-01
Supplement: d4ra05281a1.pdf [file d4ra05281a1.pdf]

## Supporting information

### **Supramolecular motifs formed by CH<sub>3</sub>/Cl-substituted arene groups: evidence for structural differences in thiophosphoramides and similarities in their complexes**

*Saeed Hosseinpoor,<sup>a</sup> Mehrdad Pourayoubi,<sup>\*a</sup> Eliška Zmeškalová<sup>b</sup>, Morgane Poupon<sup>b</sup>*

*<sup>a</sup>Department of Chemistry, Faculty of Science, Ferdowsi University of Mashhad, Mashhad, Iran.*

*<sup>b</sup>Institute of Physics of the Czech Academy of Sciences, Na Slovance 2, 182 21 Prague 8, Czech Republic*

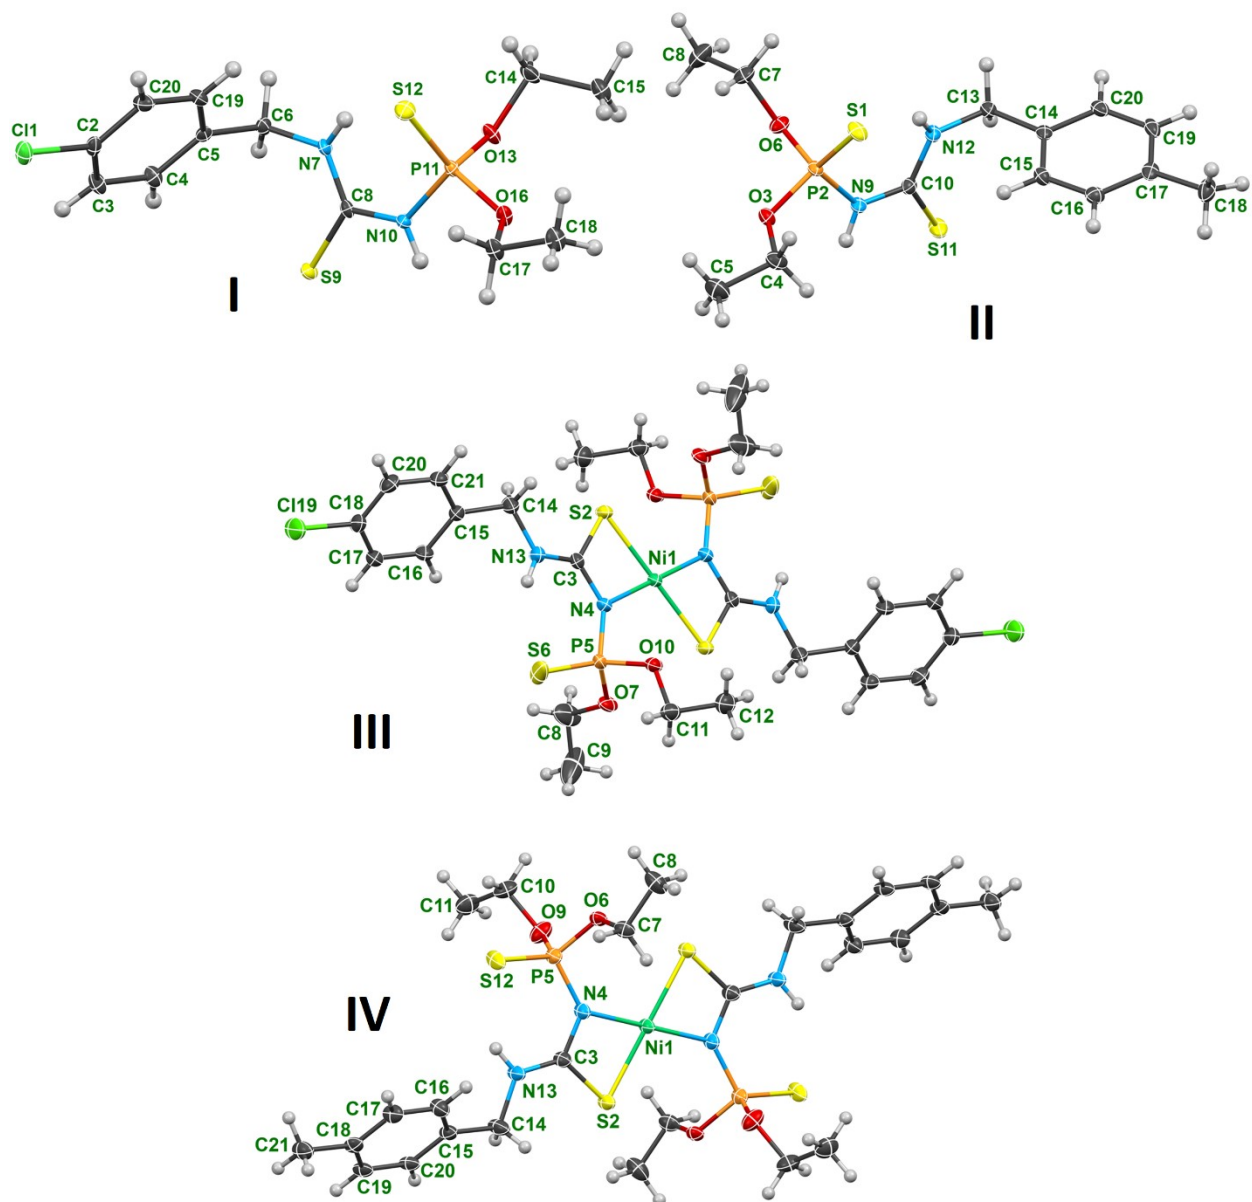

**Fig. S1** The molecular structure and atom-labeling scheme for structures (I–IV). Displacement ellipsoids are drawn at the 50% probability level.

**Table S1** Selected geometric parameters of structure **I** (Å, °)

|            |             |             |             |
|------------|-------------|-------------|-------------|
| C11—C2     | 1.7495 (14) | C8—N10      | 1.3772 (18) |
| C2—C3      | 1.382 (2)   | N10—P11     | 1.6731 (12) |
| C2—C20     | 1.388 (2)   | P11—S12     | 1.9306 (5)  |
| C3—C4      | 1.391 (2)   | P11—O13     | 1.5676 (10) |
| C4—C5      | 1.389 (2)   | P11—O16     | 1.5671 (10) |
| C5—C6      | 1.5141 (19) | O13—C14     | 1.4647 (17) |
| C5—C19     | 1.393 (2)   | C14—C15     | 1.499 (2)   |
| C6—N7      | 1.4650 (17) | O16—C17     | 1.4686 (16) |
| N7—C8      | 1.3341 (18) | C17—C18     | 1.498 (2)   |
| C8—S9      | 1.6839 (14) | C19—C20     | 1.386 (2)   |
| C11—C2—C3  | 119.53 (11) | C8—N10—P11  | 129.28 (10) |
| C11—C2—C20 | 118.98 (12) | N10—P11—S12 | 114.70 (4)  |
| C3—C2—C20  | 121.48 (13) | N10—P11—O13 | 101.81 (6)  |
| C2—C3—C4   | 118.78 (13) | S12—P11—O13 | 115.90 (5)  |
| C3—C4—C5   | 121.07 (14) | N10—P11—O16 | 102.34 (6)  |
| C4—C5—C6   | 120.86 (13) | S12—P11—O16 | 116.58 (4)  |
| C4—C5—C19  | 118.81 (13) | O13—P11—O16 | 103.48 (6)  |
| C6—C5—C19  | 120.32 (12) | P11—O13—C14 | 123.23 (9)  |
| C5—C6—N7   | 112.67 (11) | O13—C14—C15 | 111.20 (12) |
| C6—N7—C8   | 123.97 (12) | P11—O16—C17 | 123.71 (9)  |
| N7—C8—S9   | 123.07 (10) | O16—C17—C18 | 108.43 (11) |
| N7—C8—N10  | 117.15 (12) | C5—C19—C20  | 121.03 (13) |
| S9—C8—N10  | 119.78 (11) | C2—C20—C19  | 118.83 (14) |

**Table S2** Selected geometric parameters of structure **II** (Å, °)

|            |             |             |             |
|------------|-------------|-------------|-------------|
| S1—P2      | 1.9276 (6)  | C10—N12     | 1.337 (2)   |
| P2—O3      | 1.5682 (13) | N12—C13     | 1.450 (2)   |
| P2—O6      | 1.5700 (13) | C13—C14     | 1.515 (2)   |
| P2—N9      | 1.6714 (15) | C14—C15     | 1.387 (3)   |
| O3—C4      | 1.470 (2)   | C14—C20     | 1.397 (2)   |
| C4—C5      | 1.496 (3)   | C15—C16     | 1.390 (3)   |
| O6—C7      | 1.461 (2)   | C16—C17     | 1.391 (3)   |
| C7—C8      | 1.496 (3)   | C17—C18     | 1.506 (3)   |
| N9—C10     | 1.376 (2)   | C17—C19     | 1.393 (3)   |
| C10—S11    | 1.6807 (18) | C19—C20     | 1.386 (3)   |
| S1—P2—O3   | 116.52 (5)  | S11—C10—N12 | 123.11 (14) |
| S1—P2—O6   | 116.08 (5)  | C10—N12—C13 | 123.59 (15) |
| O3—P2—O6   | 102.54 (7)  | N12—C13—C14 | 113.68 (15) |
| S1—P2—N9   | 115.87 (6)  | C13—C14—C15 | 122.83 (16) |
| O3—P2—N9   | 102.11 (7)  | C13—C14—C20 | 118.93 (16) |
| O6—P2—N9   | 101.44 (7)  | C15—C14—C20 | 118.24 (16) |
| P2—O3—C4   | 121.85 (11) | C14—C15—C16 | 120.64 (17) |
| O3—C4—C5   | 106.86 (16) | C15—C16—C17 | 121.42 (18) |
| P2—O6—C7   | 121.92 (12) | C16—C17—C18 | 121.37 (19) |
| O6—C7—C8   | 107.73 (16) | C16—C17—C19 | 117.71 (17) |
| P2—N9—C10  | 129.50 (13) | C18—C17—C19 | 120.90 (18) |
| N9—C10—S11 | 119.95 (13) | C17—C19—C20 | 121.12 (17) |
| N9—C10—N12 | 116.95 (16) | C14—C20—C19 | 120.85 (17) |

**Table S3** Hydrogen-bond geometry of structure **II** (Å, °)

| <i>D</i> —H $\cdots$ <i>A</i>          | <i>D</i> —H | H $\cdots$ <i>A</i> | <i>D</i> $\cdots$ <i>A</i> | <i>D</i> —H $\cdots$ <i>A</i> |
|----------------------------------------|-------------|---------------------|----------------------------|-------------------------------|
| C4—H42 $\cdots$ O6 <sup><i>i</i></sup> | 0.97        | 2.54                | 3.476 (3)                  | 161                           |

Symmetry code: (*i*) *x*+1, *y*, *z*.

**Table S4** Selected geometric parameters of structure **III** (Å, °)

|                                      |             |            |             |
|--------------------------------------|-------------|------------|-------------|
| Ni1—C3 <sup>i</sup>                  | 2.503 (3)   | P5—O10     | 1.573 (2)   |
| Ni1—N4 <sup>i</sup>                  | 1.906 (2)   | O7—C8      | 1.457 (4)   |
| Ni1—S2 <sup>i</sup>                  | 2.2274 (7)  | C8—C9      | 1.423 (7)   |
| Ni1—P5 <sup>i</sup>                  | 3.2190 (7)  | O10—C11    | 1.452 (4)   |
| Ni1—S2                               | 2.2274 (7)  | C11—C12    | 1.498 (5)   |
| Ni1—C3                               | 2.503 (3)   | N13—C14    | 1.460 (4)   |
| Ni1—N4                               | 1.906 (2)   | C14—C15    | 1.510 (4)   |
| Ni1—P5                               | 3.2190 (7)  | C15—C16    | 1.391 (4)   |
| S2—C3                                | 1.727 (3)   | C15—C21    | 1.392 (4)   |
| C3—N4                                | 1.343 (4)   | C16—C17    | 1.392 (4)   |
| C3—N13                               | 1.317 (4)   | C17—C18    | 1.375 (5)   |
| N4—P5                                | 1.647 (2)   | C18—C119   | 1.741 (3)   |
| P5—S6                                | 1.9336 (11) | C18—C20    | 1.386 (5)   |
| P5—O7                                | 1.571 (2)   | C20—C21    | 1.385 (5)   |
| C3 <sup>i</sup> —Ni1—N4 <sup>i</sup> | 31.96 (10)  | Ni1—C3—N13 | 175.1 (2)   |
| C3 <sup>i</sup> —Ni1—S2 <sup>i</sup> | 42.32 (7)   | S2—C3—N13  | 124.5 (2)   |
| N4 <sup>i</sup> —Ni1—S2 <sup>i</sup> | 74.27 (7)   | N4—C3—N13  | 126.5 (3)   |
| C3 <sup>i</sup> —Ni1—P5 <sup>i</sup> | 54.97 (7)   | C3—N4—Ni1  | 99.36 (18)  |
| N4 <sup>i</sup> —Ni1—P5 <sup>i</sup> | 23.15 (7)   | C3—N4—P5   | 130.3 (2)   |
| S2 <sup>i</sup> —Ni1—P5 <sup>i</sup> | 97.25 (2)   | Ni1—N4—P5  | 129.79 (14) |
| C3 <sup>i</sup> —Ni1—S2              | 137.68 (7)  | N4—P5—Ni1  | 27.06 (9)   |
| N4 <sup>i</sup> —Ni1—S2              | 105.73 (7)  | N4—P5—S6   | 116.30 (10) |
| S2 <sup>i</sup> —Ni1—S2              | 179.99      | Ni1—P5—S6  | 143.30 (4)  |
| P5 <sup>i</sup> —Ni1—S2              | 82.75 (2)   | N4—P5—O7   | 106.19 (13) |
| C3 <sup>i</sup> —Ni1—C3              | 180.00      | Ni1—P5—O7  | 87.43 (9)   |
| N4 <sup>i</sup> —Ni1—C3              | 148.04 (10) | S6—P5—O7   | 114.85 (10) |
| S2 <sup>i</sup> —Ni1—C3              | 137.68 (7)  | N4—P5—O10  | 101.61 (12) |
| P5 <sup>i</sup> —Ni1—C3              | 125.03 (7)  | Ni1—P5—O10 | 86.33 (8)   |
| S2—Ni1—C3                            | 42.32 (7)   | S6—P5—O10  | 115.35 (10) |
| C3 <sup>i</sup> —Ni1—N4              | 148.04 (10) | O7—P5—O10  | 100.56 (11) |
| N4 <sup>i</sup> —Ni1—N4              | 179.99      | P5—O7—C8   | 120.8 (3)   |
| S2 <sup>i</sup> —Ni1—N4              | 105.73 (7)  | O7—C8—C9   | 110.1 (3)   |

|                         |            |              |             |
|-------------------------|------------|--------------|-------------|
| P5 <sup>i</sup> —Ni1—N4 | 156.85 (7) | P5—O10—C11   | 121.39 (18) |
| S2—Ni1—N4               | 74.27 (7)  | O10—C11—C12  | 107.2 (3)   |
| C3 <sup>i</sup> —Ni1—P5 | 125.03 (7) | C3—N13—C14   | 123.4 (3)   |
| N4 <sup>i</sup> —Ni1—P5 | 156.85 (7) | N13—C14—C15  | 111.4 (3)   |
| S2 <sup>i</sup> —Ni1—P5 | 82.75 (2)  | C14—C15—C16  | 121.8 (3)   |
| P5 <sup>i</sup> —Ni1—P5 | 180.00     | C14—C15—C21  | 119.1 (3)   |
| S2—Ni1—P5               | 97.25 (2)  | C16—C15—C21  | 119.1 (3)   |
| C3—Ni1—N4               | 31.96 (10) | C15—C16—C17  | 120.6 (3)   |
| C3—Ni1—P5               | 54.97 (7)  | C16—C17—C18  | 119.0 (3)   |
| N4—Ni1—P5               | 23.15 (7)  | C17—C18—C119 | 119.2 (3)   |
| Ni1—S2—C3               | 77.41 (10) | C17—C18—C20  | 121.8 (3)   |
| Ni1—C3—S2               | 60.27 (9)  | C119—C18—C20 | 119.0 (2)   |
| Ni1—C3—N4               | 48.68 (14) | C18—C20—C21  | 118.7 (3)   |
| S2—C3—N4                | 108.9 (2)  | C15—C21—C20  | 120.8 (3)   |

Symmetry code: (i)  $-x, -y+2, -z+1$ .

**Table S5** Selected geometric parameters of structure **IV** (Å, °)

|                                      |             |            |            |
|--------------------------------------|-------------|------------|------------|
| Ni1—C3 <sup>i</sup>                  | 2.502 (3)   | P5—S12     | 1.9370 (9) |
| Ni1—N4 <sup>i</sup>                  | 1.911 (2)   | O6—C7      | 1.468 (3)  |
| Ni1—S2 <sup>i</sup>                  | 2.2262 (6)  | C7—C8      | 1.491 (4)  |
| Ni1—P5 <sup>i</sup>                  | 3.2506 (6)  | O9—C10     | 1.452 (3)  |
| Ni1—S2                               | 2.2262 (6)  | C10—C11    | 1.492 (5)  |
| Ni1—C3                               | 2.502 (3)   | N13—C14    | 1.465 (4)  |
| Ni1—N4                               | 1.911 (2)   | C14—C15    | 1.511 (4)  |
| Ni1—P5                               | 3.2506 (6)  | C15—C16    | 1.399 (4)  |
| S2—C3                                | 1.729 (3)   | C15—C20    | 1.386 (4)  |
| C3—N4                                | 1.348 (4)   | C16—C17    | 1.382 (4)  |
| C3—N13                               | 1.316 (4)   | C17—C18    | 1.392 (4)  |
| N4—P5                                | 1.646 (2)   | C18—C19    | 1.392 (4)  |
| P5—O6                                | 1.5724 (19) | C18—C21    | 1.507 (4)  |
| P5—O9                                | 1.576 (2)   | C19—C20    | 1.387 (4)  |
| C3 <sup>i</sup> —Ni1—N4 <sup>i</sup> | 32.15 (9)   | Ni1—C3—N13 | 175.4 (2)  |
| C3 <sup>i</sup> —Ni1—S2 <sup>i</sup> | 42.41 (6)   | S2—C3—N13  | 124.0 (2)  |

|                                      |             |             |             |
|--------------------------------------|-------------|-------------|-------------|
| N4 <sup>i</sup> —Ni1—S2 <sup>i</sup> | 74.56 (7)   | N4—C3—N13   | 126.8 (2)   |
| C3 <sup>i</sup> —Ni1—P5 <sup>i</sup> | 54.13 (6)   | C3—N4—Ni1   | 98.87 (16)  |
| N4 <sup>i</sup> —Ni1—P5 <sup>i</sup> | 22.12 (7)   | C3—N4—P5    | 128.61 (19) |
| S2 <sup>i</sup> —Ni1—P5 <sup>i</sup> | 96.499 (19) | Ni1—N4—P5   | 131.96 (13) |
| C3 <sup>i</sup> —Ni1—S2              | 137.59 (6)  | N4—P5—Ni1   | 25.92 (8)   |
| N4 <sup>i</sup> —Ni1—S2              | 105.44 (7)  | N4—P5—O6    | 105.85 (11) |
| S2 <sup>i</sup> —Ni1—S2              | 179.99      | Ni1—P5—O6   | 85.18 (7)   |
| P5 <sup>i</sup> —Ni1—S2              | 83.501 (19) | N4—P5—O9    | 102.68 (11) |
| C3 <sup>i</sup> —Ni1—C3              | 180.00      | Ni1—P5—O9   | 91.73 (7)   |
| N4 <sup>i</sup> —Ni1—C3              | 147.85 (9)  | O6—P5—O9    | 100.80 (11) |
| S2 <sup>i</sup> —Ni1—C3              | 137.59 (6)  | N4—P5—S12   | 116.36 (8)  |
| P5 <sup>i</sup> —Ni1—C3              | 125.87 (6)  | Ni1—P5—S12  | 141.21 (4)  |
| S2—Ni1—C3                            | 42.41 (6)   | O6—P5—S12   | 113.91 (8)  |
| C3 <sup>i</sup> —Ni1—N4              | 147.85 (9)  | O9—P5—S12   | 115.43 (9)  |
| N4 <sup>i</sup> —Ni1—N4              | 179.99      | P5—O6—C7    | 118.87 (15) |
| S2 <sup>i</sup> —Ni1—N4              | 105.44 (7)  | O6—C7—C8    | 107.4 (2)   |
| P5 <sup>i</sup> —Ni1—N4              | 157.88 (7)  | P5—O9—C10   | 123.07 (18) |
| S2—Ni1—N4                            | 74.56 (7)   | O9—C10—C11  | 107.7 (2)   |
| C3 <sup>i</sup> —Ni1—P5              | 125.87 (6)  | C3—N13—C14  | 122.7 (2)   |
| N4 <sup>i</sup> —Ni1—P5              | 157.88 (7)  | N13—C14—C15 | 111.3 (2)   |
| S2 <sup>i</sup> —Ni1—P5              | 83.501 (19) | C14—C15—C16 | 122.0 (3)   |
| P5 <sup>i</sup> —Ni1—P5              | 180.00      | C14—C15—C20 | 119.6 (2)   |
| S2—Ni1—P5                            | 96.499 (19) | C16—C15—C20 | 118.4 (2)   |
| C3—Ni1—N4                            | 32.15 (9)   | C15—C16—C17 | 120.4 (3)   |
| C3—Ni1—P5                            | 54.13 (6)   | C16—C17—C18 | 121.5 (3)   |
| N4—Ni1—P5                            | 22.12 (7)   | C17—C18—C19 | 117.7 (2)   |
| Ni1—S2—C3                            | 77.35 (9)   | C17—C18—C21 | 121.0 (3)   |
| Ni1—C3—S2                            | 60.24 (8)   | C19—C18—C21 | 121.2 (3)   |
| Ni1—C3—N4                            | 48.98 (12)  | C18—C19—C20 | 121.1 (3)   |
| S2—C3—N4                             | 109.22 (19) | C19—C20—C15 | 120.8 (2)   |

Symmetry code: (i)  $-x+1, -y, -z+1$ .

**Table S6** The scale factors of energy components

| $k_{\text{ele}}$ | $k_{\text{pol}}$ | $k_{\text{dis}}$ | $k_{\text{rep}}$ |
|------------------|------------------|------------------|------------------|
| 1.057            | 0.740            | 0.871            | 0.618            |

**Table S7** The interaction energies for the different molecular pairs in structure **I** (energy values are in kJ/mole).  $R$  is the distance between molecular centroids in Å.

| $N$                          | Symmetry operation | $R$   | $E_{\text{ele}}$ | $E_{\text{pol}}$ | $E_{\text{dis}}$ | $E_{\text{rep}}$ | $E_{\text{tot}}$ |
|------------------------------|--------------------|-------|------------------|------------------|------------------|------------------|------------------|
| 1                            | $-x, -y, -z$       | 7.36  | -76.2            | -14.3            | -25.7            | 94.6             | -55.1            |
| 1                            | $-x, -y, -z$       | 11.84 | -4.5             | -1.4             | -26              | 19.7             | -16.2            |
| 1                            | $-x, -y, -z$       | 9.93  | -1.7             | -1.9             | -6.8             | 1.6              | -8.2             |
| 1                            | $-x, -y, -z$       | 9.49  | -5.4             | -1.2             | -23.7            | 23.1             | -13              |
| 2                            | $x, y, z$          | 10.04 | -12              | -3.3             | -27.8            | 26.3             | -23.1            |
| 2                            | $x, y, z$          | 7.63  | -11.1            | -3.3             | -26.4            | 18.3             | -25.9            |
| 2                            | $x, y, z$          | 7.67  | -14.3            | -4.4             | -50.6            | 39.4             | -38.1            |
| 1                            | $-x, -y, -z$       | 6.79  | -11.3            | -2               | -24.9            | 21.6             | -21.8            |
| 1                            | $-x, -y, -z$       | 10.58 | -4.2             | -1               | -5.8             | 0.6              | -9.9             |
| 1                            | $-x, -y, -z$       | 10.49 | -10.3            | -2               | -40.2            | 34.5             | -26              |
| 1                            | $-x, -y, -z$       | 9.08  | -1.4             | -0.3             | -3.9             | 0                | -5.1             |
| $\sum \frac{1}{2} E \cdot N$ |                    |       | -94.9            | -23.05           | -183.3           | 181.85           | -164.75          |



**Table S8** The interaction energies for the different molecular pairs in structure **II** (energy values are in kJ/mole).  $R$  is the distance between molecular centroids in Å.

| $N$                    | Symmetry operation | $R$   | $E_{\text{ele}}$ | $E_{\text{pol}}$ | $E_{\text{dis}}$ | $E_{\text{rep}}$ | $E_{\text{tot}}$ |
|------------------------|--------------------|-------|------------------|------------------|------------------|------------------|------------------|
| 1                      | $-x, -y, -z$       | 11.79 | -0.8             | -0.4             | -10              | 2.7              | -8.2             |
| 2                      | $x, y, z$          | 5.8   | -11.6            | -5.7             | -52.5            | 35.2             | -40.5            |
| 2                      | $x, y, z$          | 10.79 | -9.5             | -2.9             | -23.1            | 13.3             | -24              |
| 1                      | $-x, -y, -z$       | 7.59  | -24.5            | -3.9             | -62.2            | 58.6             | -46.7            |
| 2                      | $x, y, z$          | 12.31 | 2.2              | -0.3             | -8               | 0                | -4.8             |
| 1                      | $-x, -y, -z$       | 9.92  | 0.4              | -0.2             | -7.7             | 1.9              | -5.3             |
| 1                      | $-x, -y, -z$       | 6.7   | -79.8            | -15.9            | -30.7            | 98.8             | -61.8            |
| 1                      | $-x, -y, -z$       | 15.54 | 1.2              | -0.2             | -8.8             | 0                | -6.6             |
| 1                      | $-x, -y, -z$       | 12.08 | 1.8              | -0.9             | -22              | 0                | -17.9            |
| 1                      | $-x, -y, -z$       | 7.3   | -17.3            | -6               | -27              | 19.5             | -34.2            |
| 1                      | $-x, -y, -z$       | 9.18  | -1.6             | -0.6             | -9.9             | 7                | -6.4             |
| 1                      | $-x, -y, -z$       | 16.42 | -0.4             | 0                | -8.5             | 0                | -7.9             |
| $\sum \frac{1}{2} E.N$ |                    |       | -79.4            | -22.95           | -177             | 142.75           | -166.8           |
